# Supplementary material for: Novel Sternoclavicular Hook Plate for Traumatic Dislocations: Functional Outcomes and Complications
Source: Research Square preprint supplement (doi:10.21203/rs.3.rs-6338049/v1), 2025-05-05
Supplement: Supplementary file 1 [file 46aef7e097e644e112f4be67.docx]

**Table 1.** Patient demographics and follow-up data

|  |  | Preoperation | Postoperation | p-value |
| --- | --- | --- | --- | --- |
| Age, yr, mean (SD)  Sex, male, no (%)  Dislocation type, anterior, no (%)  Injury mechanism, traffic  accident, no (%)  Operation time, min (SD)  Blood loss, mL (SD)  Complication  CSS, mean (SD)  AS, mean (SD) | 49.3 (3.6)  44 (96)  42 (91)  44 (96)  65.2 (8.4)  46.2 (14.6)  1 fixing loss | 36.4(4.8)  7.2 (1.4) | 86.6(6.2)  1.6 (0.4) | <0.05  <0.05 |

CSS, constant shoulder score; VAS, visual analog scale
